# Supplementary material for: Loose-fit polypseudorotaxanes constructed from γ-CDs and PHEMA-PPG-PEG-PPG-PHEMA
Source: publisher site journal article supplement (doi:10.3762/bjoc.10.257), 2014-10-23
Supplement: Additional file 1 [file 1860-5397-10-257-S1.pdf]

## Supporting Information

for

# Loose-fit polypseudorotaxanes constructed from $\gamma$ -CDs and PHEMA-PPG-PEG-PPG-PHEMA

Tao Kong, Lin Ye, Ai-ying Zhang and Zeng-guo Feng\*

Address: School of Materials Science and Engineering, Beijing Institute of Technology,  
Beijing 100081, China

Email: Zeng-guo Feng - [sainfeng@bit.edu.cn](mailto:sainfeng@bit.edu.cn)

\*Corresponding author

### Additional GPC trace and $^1\text{H}$ NMR spectral data

#### Content:

- GPC trace of PEP26M.
- $^1\text{H}$  NMR spectrum of PEP26M.
- $^1\text{H}$  NMR spectrum of BrPEPBr.

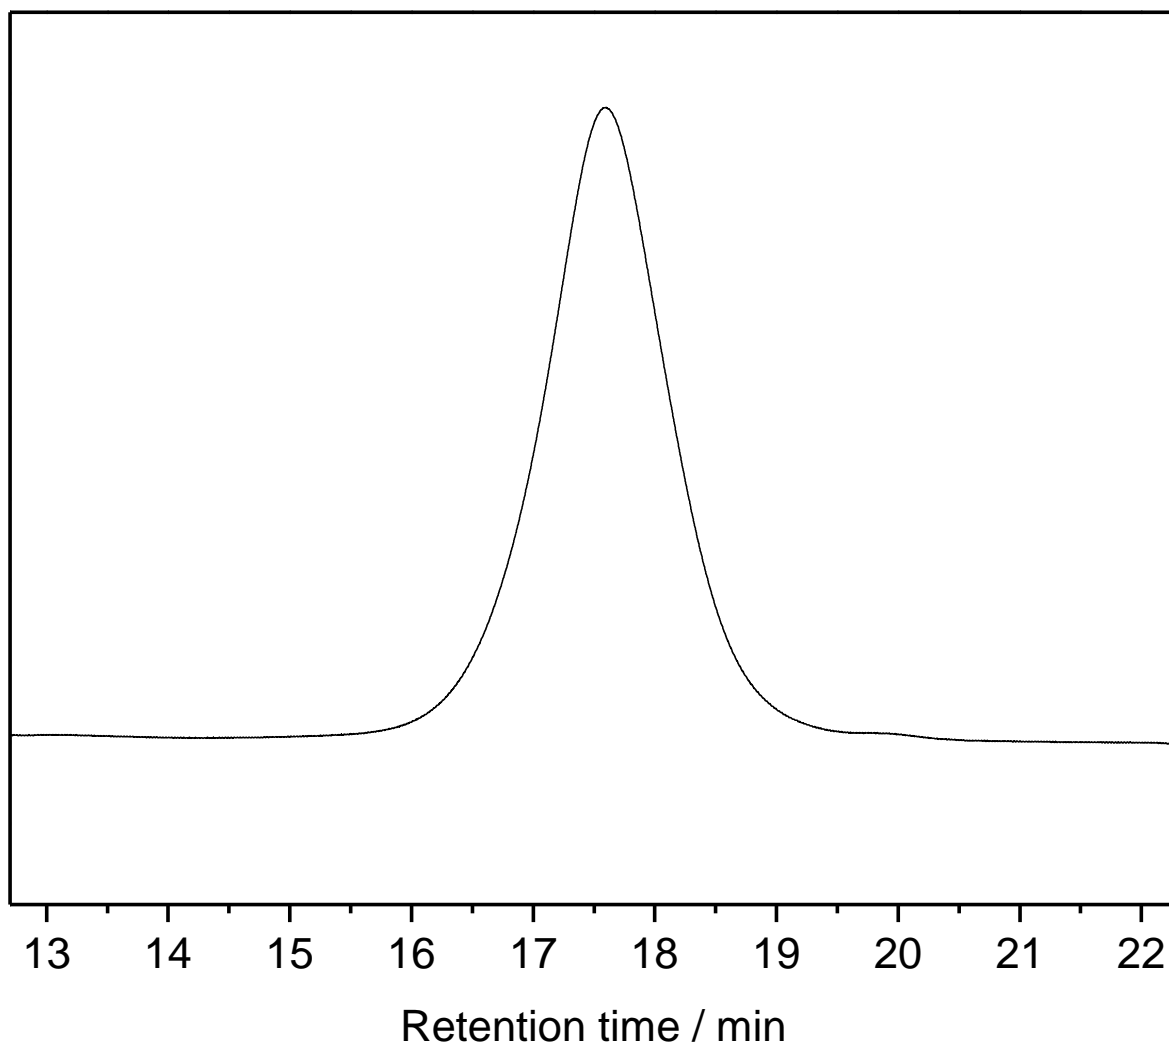

Figure S 1: GPC trace of PEP26M.

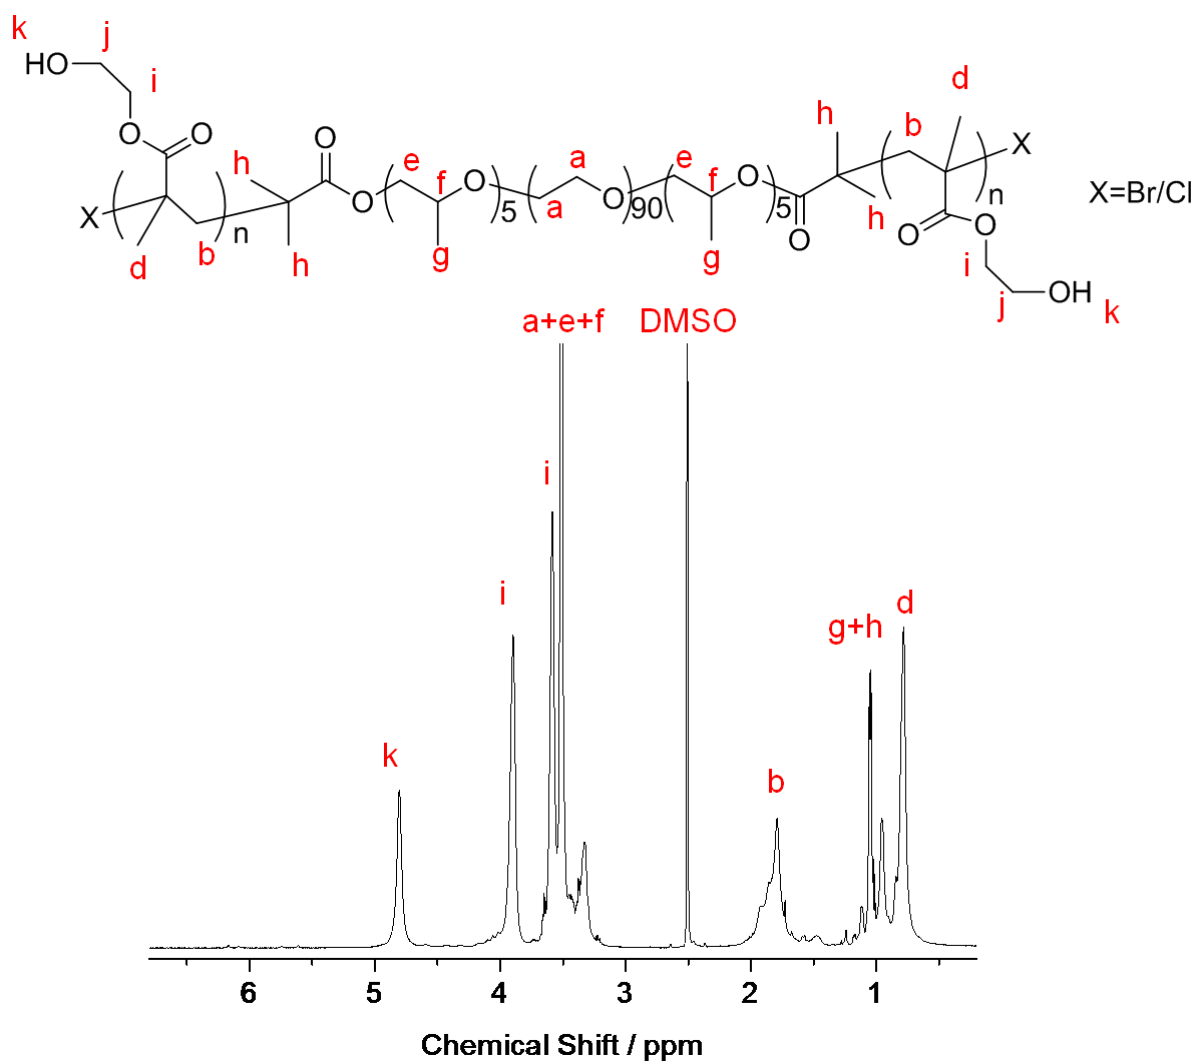

Figure S 2:  $^1\text{H}$  NMR spectrum of PEP26M.

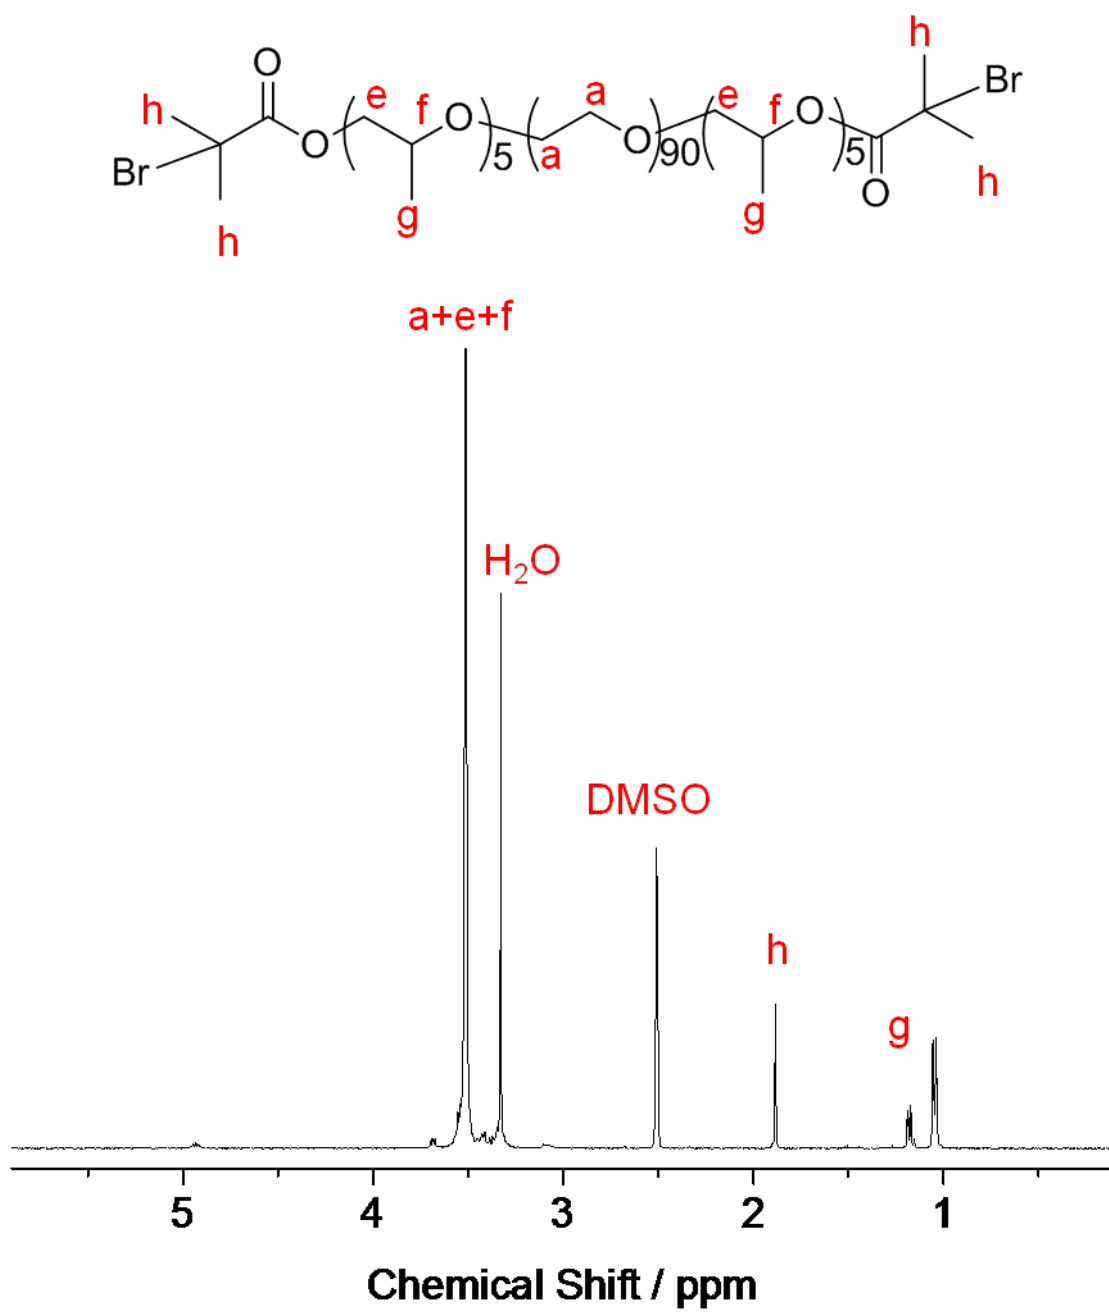

Figure S 3: <sup>1</sup>H NMR spectrum of BrPEPBr.
